# 1 **Sex in the wild: how and why field-based studies** 2 **contribute to solving the problem of sex**

3 Maurine Neiman<sup>1\*</sup>, Patrick G. Meirmans<sup>2</sup>, Tanja Schwander<sup>3</sup> & Stephanie Meirmans<sup>4\*</sup>

4  
5 <sup>1</sup>Department of Biology  
6 University of Iowa  
7 Iowa City, IA, 52242, USA  
8 Tel: +1 319 384 1814  
9 Fax: +1 319 335 1069  
10 maurine-neiman@uiowa.edu

11  
12 <sup>2</sup>Institute for Biodiversity and Ecosystem Dynamics (IBED)  
13 University of Amsterdam  
14 P.O. Box 94248, 1090GE Amsterdam  
15 Tel: +31 20 5258424  
16 Fax: +31 20 5257832  
17 p.g.meirmans@uva.nl

18  
19 <sup>3</sup>Department of Ecology and Evolution  
20 University of Lausanne  
21 CH-1015 Lausanne  
22 Tel: +41 21 6924151  
23 Fax: +41 21 6924165  
24 tanja.schwander@unil.ch

25  
26 <sup>4</sup>Academic Medical Center (AMC)  
27 University of Amsterdam  
28 1105 AZ Amsterdam, NL  
29 s.meirmans@amc.uva.nl

30  
31 \*Corresponding authors

32  
33 Running Title: Sex in the wild

34  
35 Keywords: sexual reproduction, asexual reproduction, parthenogenesis, Red Queen, niche  
36 differentiation, Muller's ratchet

## 37 38 **Author contributions**

39 SM and MN conceived the paper idea, SM, PM, MN, and TS designed the review strategy,  
40 reviewed and analysed the literature, and wrote the manuscript. All authors gave final approval  
41 for publication.

## 42 **Acknowledgements**

43 We acknowledge Curt Lively for useful discussions on the history and development of the Red  
44 Queen hypothesis for sex and members of the Neiman lab as well as several anonymous  
45 reviewers and Associate Editor Britt Koskella for helpful comments on earlier versions of the  
46 MS. TS was supported by SNSF grant PP00P3 139013.  
47

## 48 **Data archival location**

49 The results of our literature survey are provided as electronic supplementary material.  
50

## 51 **Abstract**

52 Why and how sexual reproduction is maintained in natural populations, the so-called “queen of  
53 problems”, is a key unanswered question in evolutionary biology. Recent efforts to solve the  
54 problem of sex have often emphasized results generated from laboratory settings. Here, we use a  
55 survey of representative “sex in the wild” literature to review and synthesize the outcomes of  
56 empirical studies focused on natural populations. Especially notable results included relatively  
57 strong support for mechanisms involving niche differentiation and a near absence of attention to  
58 adaptive evolution. Support for a major role of parasites is largely confined to a single study  
59 system, and only three systems contribute most of the support for mutation accumulation  
60 hypotheses. This evidence for taxon specificity suggests that outcomes of particular studies  
61 should not be more broadly extrapolated without extreme caution. We conclude by suggesting  
62 steps forward, highlighting tests of niche differentiation mechanisms in both lab and nature and  
63 empirical evaluation of adaptive evolution-focused hypotheses in the wild. We also emphasize  
64 the value of leveraging the growing body of genomic resources for non-model taxa to address  
65 whether the clearance of harmful mutations and spread of beneficial variants in natural  
66 populations proceeds as expected under various hypotheses for sex.

## 67 Introduction

68 Ask evolutionary biologists about unresolved problems in evolution, and many will question  
69 why so many eukaryotic species produce offspring via sexual reproduction (“sex”). The  
70 predominance of sex was first identified as a major unanswered question by leading twentieth  
71 century evolutionary biologists such as George Williams and John Maynard Smith, who  
72 developed theory demonstrating that sexual reproduction should be at a substantial disadvantage  
73 vis-à-vis asexual reproduction and thus be rapidly replaced by the latter (Maynard Smith 1971,  
74 1978, Williams 1975). This theory is based on the recognition that sex can impose a variety of  
75 costs (e.g., males, recombination, for a recent overview see Lehtonen et al. 2012, Meirmans et al.  
76 2012) that should translate into major advantages for asexual reproduction. The central place of  
77 the problem of sexual reproduction in evolutionary theory is illustrated by Graham Bell’s 1982  
78 statement that the maintenance of sex is the “queen of problems” in evolutionary biology (Bell  
79 1982). Within a decade or so after the paradox of sexual reproduction was first identified, dozens  
80 of hypotheses for sex had been proposed (Kondrashov 1993). Most of these hypotheses focused  
81 on direct or indirect benefits of sexual reproduction that can outweigh (at least in principle) the  
82 costs of sex (reviewed in Neiman and Schwander 2011) and that are linked to genetic  
83 consequences of meiotic recombination and segregation (e.g., Agrawal 2009a,b). Despite all of  
84 this attention and the forty or so years that have passed since the problem of sex was identified,  
85 the evolutionary mechanisms underlying the maintenance of sex are still unclear (e.g., Sharp and  
86 Otto 2016, Neiman et al. 2017).

87         The crux of the problem of the maintenance of sex is the persistence of sexual  
88 reproduction in so many species, and especially the maintenance of sex in natural populations of  
89 organisms or lineages that can use asexual reproduction to produce offspring. Even so, most

90 recent attention towards empirical tests of mechanisms favoring sex has focused on results  
91 generated by experimental evolution in laboratory settings. Laboratory studies, which nearly  
92 always use genetic model systems (e.g., *Drosophila melanogaster* (Singh et al. 2015),  
93 *Saccharomyces cerevisiae* (McDonald et al. 2016), *Tribolium castaneum* (Lumley et al. 2015),  
94 *Brachionus calyciflorus* (Becks and Agrawal 2012)), are very powerful because the focal  
95 mechanisms can be manipulated and isolated. Indeed, lab-focused studies have provided  
96 important tests of the potential for particular mechanisms for sex to be applicable under specific  
97 circumstances (e.g., sexual selection-facilitated clearance of mutational load, strong selection for  
98 adaptation to new environments; reviewed in Sharp and Otto 2016).

99         A critical complement to these insights from the laboratory will come from  
100 characterization of the mechanisms contributing to the maintenance of sex in natural populations.  
101 In particular, despite the rigor and elegance of many laboratory studies, it can be difficult to  
102 determine whether their outcomes can be extrapolated to natural conditions. This challenge is  
103 exemplified by a recent example of a case where field and lab studies addressing the same  
104 mechanisms for sex generated opposite results (Lavanchy et al. 2016).

105         There are multiple and non-mutually exclusive potential explanations for differences  
106 between the outcomes of laboratory and field studies. One important consideration is that model  
107 organisms are characterized by short generation times, large populations, and small body sizes,  
108 which is not representative of the bulk of metazoans. Model organisms are also often the  
109 products of decades of laboratory culture and thus are almost certainly adapted to laboratory  
110 conditions (e.g., Sterken et al. 2015). It is also impossible to perform laboratory-based studies  
111 featuring all factors that are likely relevant to the realized costs and benefits of sexual  
112 reproduction, including locally adapted parasites and predators, competitors for limited

113 resources, extreme abiotic conditions, and unpredictable environmental changes. An additional  
114 challenge is that the inclusion of these factors in laboratory experiments can translate into  
115 conditions that are unlikely to characterize natural populations, e.g., unrealistically high doses of  
116 infectious parasites or the imposition of direct competition between sexual and asexual  
117 individuals that experience niche differentiation in the wild. While studies focused on natural  
118 populations, and in particular, field-based studies, are more realistic, they cannot match lab  
119 studies with respect to the ability to control variables and achieve causal inference. The take-  
120 home message is that the insights from field and laboratory studies ultimately need to be  
121 integrated in order to produce robust insights into natural patterns and processes.

122         Here, we provide a synthetic overview of “sex in the wild” studies, the first of which we  
123 are aware since Bell (1982). We addressed this goal by performing a survey of directly relevant  
124 empirical literature to (1) assess the contributions of field studies towards resolving the sex  
125 problem, (2) identify what we have learned from these studies and what we still need to know,  
126 and (3) provide some concrete steps forward.

## 127 **Methods**

### 128 *Literature survey approach*

129 We began our survey by establishing a set of *a priori* criteria for study inclusion. These criteria  
130 were formulated with the goal of only including studies that could directly inform the  
131 maintenance of sex in natural populations. First of all, this meant that the study had to be  
132 performed in the field or use field-collected individuals that were not subsequently subject to the  
133 potential for selection in a laboratory environment. We included studies with laboratory-reared  
134 individuals only in those cases where lab rearing was unlikely to influence the factors that are the

135 focus of testing (e.g., establishment of phylogenetic relationships). We therefore excluded  
136 studies where the potential for laboratory-imposed selection could confound the ability to  
137 interpret the study outcome, e.g. via laboratory-cultured lineages (e.g., Xu et al. 2011).

138         Second, we confined our survey to studies explicitly focused on investigating a particular  
139 mechanism for the maintenance of sex. We chose to adopt this mechanism-centered approach  
140 because this type of research takes place in a structured framework that facilitates meaningful  
141 comparisons among studies. Our strategy does have some limitations in excluding other valuable  
142 types of studies, including but not limited to evaluation of population genetic principles in  
143 natural populations (e.g., Menken et al. 1995, Lo et al. 2009), establishing the biogeographic  
144 distribution of sexual vs. asexual reproduction (e.g., geographic parthenogenesis; see Tilquin and  
145 Kokko 2016 for a recent overview), or describing unusual natural manifestations of reproductive  
146 strategies (e.g., Aanen et al. 2016).

147         Finally, we only included studies featuring obligately asexual individuals and  
148 facultatively or obligately sexual individuals that are sympatric in nature in at least part of their  
149 range. We made this choice because our goal is to identify the mechanisms that underlie the  
150 maintenance of sex in natural populations. Field-based studies in systems that feature  
151 sexual/asexual sympatry mean that the sexuals and asexuals can experience direct competition  
152 and allow for the most direct comparisons (with the fewest confounding factors) between  
153 reproductive modes. We do acknowledge that this particular approach does have limitations,  
154 such as the inability to directly address why some sexual lineages are not subject to invasion by  
155 asexual counterparts. We excluded all studies of sperm-dependent asexual taxa (e.g., *Ambystoma*  
156 mole salamanders, *Ips* bark beetles, *Rubus* subgenus *Rubus* blackberries) because all-asexual  
157 populations of sperm-dependent organisms are not evolutionarily stable.

158           We then classified and described each study according to the mechanism that the study  
159 addressed (as outlined below), the methods used, the study outcomes, whether the study  
160 supported or did not support the focal mechanism, and the taxonomic group represented by the  
161 focal organisms (see supplementary material; Table S1). We included an “Other” category to  
162 account for studies that addressed mechanisms or conditions with the potential to favor sex that  
163 did not easily fit under the umbrella of an established mechanism (e.g., reproductive assurance,  
164 which is largely confined to asexuals but needs to be tested by comparing sexuals and asexuals).  
165 We classified the species by class, following the U.S. Interagency Taxonomic Information  
166 System; when species from multiple classes were addressed, we used the lowest shared  
167 taxonomic level.

168           We included individual studies in more than one mechanism category if (a) the study  
169 found evidence for or against multiple mechanisms or (b) whether and how the study tested  
170 mechanisms was not clear enough to identify a single mechanism that was the focus of the paper.  
171 In the latter situation, we assessed each study carefully and then assigned the study to each  
172 mechanism that in our view was tested by the study design and/or was supported by the evidence  
173 delivered by the study. We termed each incidence of a distinct test of a distinct mechanism a  
174 “case”, which meant that some studies are represented by more than one case. We use this  
175 terminology consistently throughout the rest of the paper. We concluded our survey at the end of  
176 the summer of 2017, meaning that only papers published by this time were able to be included.

177

### 178 *Mechanisms underlying the benefits of sex*

179 Sex, via segregation and recombination, breaks up linkage disequilibria (LD) across loci (Hill  
180 and Robertson 1966). This consequence of sexual reproduction is the reason that most

181 mechanisms for the maintenance of sex focus on identifying conditions or situations associated  
182 with benefits of breaking up LD. Theoretical analyses have highlighted situations where  
183 selection changes over time and/or space or when linkage is generated by the combination of  
184 selection and drift as the conditions that are most likely to produce such benefits (Barton 2009).  
185 Field-based studies of sex that address benefits of LD breakup have typically focused on  
186 ecological situations (e.g., coevolving parasites or spatially structured niches, see below) that are  
187 expected to translate into changes in selection over space or time, but do not generally establish  
188 explicit links to the genetic mechanisms conferring benefits to sex. For this reason we *a priori*  
189 delineated the major mechanisms for sex by ecological mechanisms or scenarios that can  
190 generate or are associated with changes in selection.

191         We acknowledge several limitations of our approach to mechanism characterization.  
192 First, some of these categories feature conceptual overlap (e.g., “parasites” and “increased rate of  
193 adaptive evolution”, from the perspective that sexuals that can adapt more quickly to parasites  
194 might be at an advantage), while other categories could be combined to make even broader  
195 categories (e.g., all niche-based mechanisms; all hypotheses generated by genetic linkage).  
196 Second, it is virtually certain that some evolutionary biologists would produce different  
197 classification systems. Finally, we decided to separate mechanisms involving disadvantages to  
198 asexual lineages via reduced rates of adaptive evolution and increased rates of harmful mutation  
199 accumulation into separate categories. Although both phenomena are the consequence of the  
200 reduced efficacy of selection at linked sites (Hill-Robertson effect; Hill and Robertson 1966,  
201 Felsenstein 1974), different empirical methods are typically applied to detect evidence for  
202 ineffective adaptive evolution vs. ineffective purifying selection.



203 *Parasites*

204 Biological antagonism –what we henceforth refer to as “parasites” or parasite pressure”– is  
205 potentially connected to the maintenance of sex because parasites can generate rapid changes in  
206 the direction of selection. The most prominent of the parasite mechanisms is the “Red Queen”  
207 (Bell 1982, Jaenike 1978, Hamilton 1980), under which parasites can help maintain sex by  
208 imposing negative frequency-dependent selection favoring rare host genotypes. Links between  
209 sex and biological antagonism can be driven by other mechanisms (e.g., Haafke et al. 2016),  
210 though the Red Queen-sex connection seems to be the most theoretically robust (e.g., Hamilton  
211 et al. 1990, Howard and Lively 1994, Peters and Lively 1999) and has received more empirical  
212 attention and support than other parasite-driven mechanisms for sex (reviewed in Neiman and  
213 Koskella 2009, Lively and Morran 2014).

214 *Rate of adaptive evolution*

215 Selection works most effectively if beneficial and deleterious mutations occur in different  
216 individuals because these individuals should experience larger differentials in relative fitness  
217 than when mutations with opposite fitness effects co-occur within individuals (Hill and  
218 Robertson 1966). Over time, drift in the presence of selection may therefore lead to the  
219 accumulation of genomes where favorable and harmful alleles are linked. Sex can generate  
220 benefits in this situation in two ways: by immediately exposing ‘hidden variation’ (both  
221 favorable and harmful) to selection and by enabling more effective adaptive evolution at longer  
222 time scales.

223 *Harmful mutations*

224 Hill-Robertson effects are expected to translate into increased rates of harmful mutation  
225 accumulation via relatively ineffective purifying selection in asexual vs. sexual lineages.  
226 Muller's ratchet, which will cause irreversible mutation accumulation in small populations, is  
227 also expected to disproportionately affect asexual lineages (Muller 1964).

228 *Niche differentiation*

229 One of the simplest mechanisms that enables coexistence between asexuals and their sexual  
230 relatives is niche differentiation. In the most extreme case of non-overlapping sexual and asexual  
231 niches, there is no competition between sexuals and asexuals, rendering costs of sex irrelevant  
232 (Meirmans et al. 2012). Perhaps because of its simplicity, there exist only a few theory-focused  
233 papers on this topic. One exception is the modelling study by Case and Taper (1986), who  
234 showed that niche differentiation can arise through character displacement after invasion of a  
235 sexual population by an asexual lineage. In practice, however, this mechanism is difficult to test:  
236 it is challenging to estimate the degree of niche overlap in natural populations and to determine  
237 whether the observed degree of niche differentiation between sexuals and asexuals is enough to  
238 prevent competition-driven extinction of one of the reproductive modes.

239 *Niche breadth*

240 There are a variety of formulations of the overarching mechanism that sex can be maintained in  
241 situations where sexual individuals, lineages, or populations cover larger fractions of the  
242 available niche space than asexual counterparts. The most prominent example is the Tangled  
243 Bank hypothesis (Bell 1982), which postulates that sexual reproduction can be favored by  
244 generating a genetically diverse set of offspring that can make efficient use of a heterogeneous

245 habitat via reduction in competition between siblings for limited resources. Asexually produced  
246 siblings, on the other hand, will compete for these same resources because they are genetically  
247 similar (also predicted by the conceptually similar frozen niche concept (Vrijenhoek 1979)). This  
248 advantage of sexual reproduction is increasingly offset as asexual lineage diversity increases,  
249 assuming that higher asexual diversity translates into more variable resource utilization by the  
250 asexual population.

## 251 **Results**

252 Our literature survey of 66 studies (83 cases; some studies focused on multiple mechanisms)  
253 addressing the mechanisms underlying the maintenance of sex in the wild revealed some clear  
254 patterns (Table 1). First, there is a distinct majority of support (56 cases) vs. lack of support (27  
255 cases), perhaps reflecting a publication bias towards positive results. The parasite and niche  
256 differentiation mechanisms predominated amongst the studies featuring positive results; we  
257 elaborate on these and other mechanism-specific patterns below. Our survey also clearly showed  
258 that some taxa have been the focus of far more investigation than others. The vast majority of  
259 studies involved animal systems (54 studies; 82%), which themselves were dominated by  
260 gastropods (23 studies), branchiopods (eight studies), reptiles (eight studies), and insects (six  
261 studies). The remaining 16% of the studies were in plants (11 studies; all  
262 Magnoliopsida/angiosperms) and fungi (one study). Some systems were particularly heavily  
263 represented. For example, the gastropod *Potamopyrgus antipodarum* was featured in 16 studies  
264 (see supplementary material, Table S1, for an overview). Other taxa common in our survey  
265 included the branchiopod *Daphnia pulex* (seven studies), the gastropod *Melanooides tuberculata*  
266 (four studies), and the angiosperm *Taraxacum officinale* (four studies). Only two studies applied

267 a broad taxonomic approach, using comparisons of the ecologies of hundreds of sexual and  
268 asexual taxa (Ross et al. 2013, van der Kooi et al. 2017) to detect associations with, or  
269 consequences of, reproductive mode variation that apply across taxa.

## 270 *Parasites*

271 Our search revealed 30 cases (representing 29 studies; one study with mixed results contributed  
272 two cases) that considered the maintenance of sex from the perspective of selection imposed via  
273 parasitism, by far the most frequently tested of the five main mechanism categories that we  
274 distinguished. Twenty of these cases reported results consistent with the expectations of  
275 situations where parasites are contributing to the maintenance of sex. Nearly all cases (27/30)  
276 focused at least in part on the Red Queen. A distinct majority of these Red Queen cases (15/27)  
277 involved the interaction between the snail *Potamopyrgus antipodarum* and the trematode parasite  
278 *Microphallus* ‘lively’. The three parasite-focused papers that did not explicitly address the Red  
279 Queen considered broader formulations of the parasite/antagonism mechanism (e.g., “parasitism  
280 rate”, “herbivory”).

## 281 *Rate of adaptive evolution*

282 Our survey identified only three cases that addressed rates of adaptive evolution in the context of  
283 the maintenance of sex. All three of these cases took what we viewed as indirect approaches to  
284 this question, addressing whether sexuals were more often found in unpredictable abiotic  
285 environments that would likely demand rapid adaptation relative to the environments harboring  
286 asexual counterparts. Two ostracod-focused cases reported evidence consistent with this  
287 prediction, with sexual ostracods associated with relatively harsh and unpredictable  
288 environments (Schmit et al. 2013a,b). By contrast, parasites seemed to be a more likely

289 explanation of patterns of distribution of sexual vs. asexual New Zealand freshwater snails than  
290 rapidly changing abiotic components of the environment (Lively 1987). Direct empirical  
291 evaluation of whether sexual organisms feature higher rates of adaptive evolution than their  
292 asexual relatives in natural populations clearly deserves future attention. Despite ample evidence  
293 for the importance of drift in natural populations (e.g., all studies supporting the ‘mutation  
294 accumulation’ mechanism), we found no field-based studies that investigated whether sex  
295 generates short-term benefits by exposing hidden genetic variation to selection.

### 296 *Mutation accumulation*

297 The prediction that deleterious mutations accumulate more rapidly in asexual than sexual  
298 lineages has been tested in multiple taxa. Most cases (14 out of 19 cases; Table 1) were  
299 consistent with a scenario where asexuals accumulate deleterious mutations more rapidly than  
300 sexual lineages. Even so, nearly all (15/19) cases are based on a handful of genes, raising the  
301 question of the extent to which these results are likely to hold for the genome as a whole. Only  
302 four studies extended analyses of deleterious mutation accumulation to the genome scale  
303 (Hollister et al. 2015, Ament-Velásquez et al. 2016, Brandt et al. 2017, Lovell et al. 2017). Three  
304 of these studies (Hollister et al. 2015, Ament-Velásquez et al. 2016, Lovell et al. 2017) found  
305 that, as expected, asexuals had a higher load of deleterious mutations than sexuals. The fourth  
306 study (Brandt et al. 2017) found that *sexual* taxa experienced more mutation accumulation than  
307 asexual counterparts. This latter study focused on asexual lineages that are extremely old (tens of  
308 million years since derivation from sexual ancestors), suggesting that the absence of deleterious  
309 mutation accumulation may have contributed to the long-term persistence of these lineages in the  
310 absence of sex.

311 *Niche differentiation*

312 We identified 17 cases that considered the maintenance of sex from the perspective of niche  
313 differentiation. Together with harmful mutations, these studies featured the broadest taxonomic  
314 support of the mechanism categories, representing six of the 11 taxonomic classes in Table 1.  
315 Tests for niche differentiation were most common in angiosperms, representing six of 17 cases.  
316 Thirteen of these 17 cases found at least some support for niche differentiation between sexuals  
317 and asexuals. Only three of these cases took the critical and perhaps most challenging additional  
318 step of determining whether the observed niche differentiation is enough to eliminate  
319 competition between sexuals and asexuals (O'Connell and Eckert 2001, Lehto and Haag 2010,  
320 Schmit et al. 2013a). All three cases did indeed suggest that niche differentiation between  
321 sexuals and asexuals was substantial enough that direct competition is unlikely, which should in  
322 turn resolve the problem of sex by rendering costs of sex irrelevant.

323 *Niche breadth*

324 We identified eight cases where niche breadth was compared between asexual taxa and sexual  
325 counterparts, representing five taxonomic groups. In all but one case, the asexuals were  
326 characterized by broader niches than their sexual relatives. While most of these studies just  
327 focused on one or a few systems, the two studies that evaluated hundreds of species reported the  
328 same pattern (Ross et al. 2013, van der Kooi et al. 2017). Because the maintenance of sex via  
329 differential coverage of niche space requires that *sexuals* cover more niche space (and not, as  
330 found here, asexuals), our survey suggests that niche-breadth related mechanisms generally do  
331 not contribute to the maintenance of sex in the wild.

## 332 **Discussion**

333 Perhaps most prominently, our survey revealed an important role for niche differentiation  
334 mechanisms in the maintenance of sex. This finding is also consistent with the many examples of  
335 geographical parthenogenesis and the observation that sexual and asexual individuals or lineages  
336 often differ in other key elements of their biology or ecology (e.g., hybrid status, polyploidy,  
337 production of resting eggs) (see also Meirmans et al. 2012). It is important to note that our  
338 survey revealed pervasive niche differentiation between sexuals and asexuals even in the  
339 exclusion of all studies focused on sexual and asexual taxa with non-overlapping ranges. While  
340 including these latter studies would perhaps have suggested an even stronger pattern of niche  
341 differentiation, without sympatric sexuals and asexuals, it is impossible to determine whether  
342 niche differentiation is a consequence of evolutionary divergence (character displacement  
343 following competition between sexual and asexual lineages) versus other factors such as  
344 biogeographic history (secondary contact). Evidence for the potential importance of niche  
345 differentiation from the field is striking because this mechanism has not otherwise received  
346 prominent attention in reviews on the benefits of sex (see Sharp and Otto (2016) for a recent  
347 example). We suspect that this inattention might be at least in part linked to the scarcity of  
348 theoretical studies on niche differentiation.

349         In contrast to niche differentiation, there was very little support for the related but distinct  
350 niche breadth mechanisms such as Tangled Bank (Bell 1982). While this type of mechanism has  
351 received quite a bit of theoretical attention (e.g., Bell 1982, Case and Taper 1986, Pound et al.  
352 2002), they seem to have very little empirical backing: in our survey, we found seven examples  
353 of negative results and only one example of support among the eight niche breadth-focused cases  
354 in our survey. This finding is in agreement with the general sentiment from earlier sex-focused

355 research that revealed little evidence for Tangled Bank-like mechanisms (Ellstrand and  
356 Antonovics 1985, Burt and Bell 1987, but see Song et al 2011).

357 Another striking finding of our study was the absence of field studies focused on testing  
358 whether an increased rate of adaptive evolution might help favor sexual over asexual organisms.  
359 While there is substantial theoretical (Barton 1995, Burt 2000) and lab-based (e.g., Kaltz and  
360 Bell 2002, Goddard et al. 2005, McDonald et al. 2016) support for an important role for sexual  
361 reproduction in facilitating adaptive evolution, we only found three field-based studies that  
362 directly addressed whether sexuals have an adaptability advantage relative to asexual  
363 counterparts. One likely explanation for this distinct difference is that adaptability hypotheses are  
364 more difficult to rigorously test in the wild and are thus difficult to propose, fund, or execute. We  
365 also cannot exclude the possibility that publication bias (e.g., the challenges in publishing  
366 negative results) plays a role here or throughout our survey.

367 Most of the positive evidence in our survey comes from studies addressing the Red  
368 Queen hypothesis, a particular formulation of the parasite mechanism for sex. A distinct majority  
369 of these Red Queen-focused studies found evidence that parasite-host interactions contribute to  
370 the maintenance of sex. While the relatively large number and generally positive outcome of  
371 these studies might be taken as evidence that the Red Queen can provide a general explanation  
372 for the maintenance of sex in natural populations, the fact that most of these cases (15/ 27;  
373 ~55%) involve a single study system, *Potamopyrgus antipodarum*, means that this conclusion  
374 would be premature. The issues posed by dominance of a particular study system with respect to  
375 tests of a particular mechanism are highlighted by the fact that 15/15 cases in the *Potamopyrgus*  
376 system are consistent with the expectations of the Red Queen, compared to only five of 12 cases  
377 from other taxa (see Table S1 for more details). The problem of non-independence that arises



378 from multiple tests of the same mechanism in the same system are heightened when, as for many  
379 sexual/asexual systems, there is only one transition to asexual reproduction, and thus, only one  
380 possible phylogenetically independent comparison. In general, our take-home message is that  
381 emergence of any mechanism as one that confers broad explanatory power for understanding sex  
382 in nature will require support from a diverse array of natural systems.

383         While many cases (12/17) provide at least some support for mutation accumulation  
384 mechanisms, most of the confirmatory evidence comes from only three study systems: *Daphnia*,  
385 *Potamopyrgus*, and *Campeloma*. All directly relevant genome-scale analyses of deleterious  
386 mutation accumulation of which we are aware have found considerable among-gene variation  
387 with respect to the rate of deleterious mutation accumulation in sexual and asexual lineages.  
388 Because of this among-gene variation, the inferences generated by the 15 cases that only  
389 included a handful of genes must be viewed with caution. Indeed, one of the four cases that did  
390 investigate mutation accumulation at the whole-genome scale in the wild found that, contrary to  
391 predictions, sexual taxa experienced more mutation accumulation (Brandt et al. 2017). Finally,  
392 although there appears to be some general support for deleterious mutation accumulation in  
393 asexual lineages, it is important to note that this mechanism is unlikely to explain the  
394 maintenance of sex. The reason for this caveat is that mutation accumulation generates a long-  
395 term disadvantage for asexuality, whereas short-term advantages are required for the  
396 maintenance of sex within populations (Maynard Smith 1978).

397         No single mechanism emerged as being important to the maintenance of sex across all  
398 natural systems included in our survey. This result provides indirect support for the idea that  
399 different mechanisms for sex might be important for different taxa (see also Neiman et al. 2017).  
400 While the notion that multiple mechanisms are of relevance to the maintenance of sex in nature

401 would not surprise most of the researchers who study this topic, our survey results emphasize the  
402 importance of including a variety of taxa and considering multiple mechanisms when studying  
403 the maintenance of sex. Direct tests of the importance of this type of pluralism are conceptually  
404 simple but logistically challenging: the simultaneous study of multiple mechanisms across a  
405 diverse array of appropriate taxa in natural settings. The related but distinct point regarding the  
406 existence of a variety of different evolutionary “schools” concerning the maintenance of sex  
407 (Gouyon 1999, Meirmans and Strand 2010) also highlights the value of research on the same  
408 mechanisms or systems by multiple independent investigator groups.

#### 409 *Outlook*

410 Important steps forward for field-based research on the maintenance of sex will ideally come  
411 from several angles, which should perhaps most prominently include rigorous evaluation of the  
412 Red Queen hypothesis for sex in a diverse array of systems and direct tests for adaptive evolution  
413 (especially short-term effects) in natural settings. Especially insightful results with respect to the  
414 latter could be obtained from field experiments where sexuals and asexuals are transferred to (1)  
415 relatively harsh and/or unpredictable habitats, and (2) a relatively stable habitat, and where  
416 adaptation to the environment is tracked over multiple generations (see Lavanchy et al. 2016 for  
417 an example). Other useful tests could come from creative leveraging of unpredictable events  
418 (e.g., floods, fire, or even climate change) that might be expected to enable the detection of rapid  
419 adaptation. Finally, researchers could evaluate whether sex generates short-term benefits in natural  
420 populations via the exposure of hidden genetic variation to selection by comparing genetic  
421 variation for fitness in naturally occurring and coexisting sexual and asexual organisms over  
422 multiple generations.

423           With respect to other mechanisms for the maintenance of sex, our study suggests that  
424 broader attention to niche differentiation mechanisms would likely turn out to be fruitful. In  
425 particular, the application of mesocosm approaches that reasonably reflect inherent natural  
426 complexity could bridge field and laboratory insights (e.g., Ganz and Ebert 2010). Throughout,  
427 we expect that an increasing availability of genomic resources for non-model taxa that have  
428 achieved prominence as the focus of “sex in the wild” studies (e.g., *Potamopyrgus antipodarum*  
429 (Bankers et al. 2017); *Taraxacum officinale*, E. Schranz pers. comm.) will provide a critical  
430 means of testing mechanisms for sex that make specific predictions regarding molecular  
431 evolution. We also believe that “pluralist” approaches that explicitly consider the possibility that  
432 different mechanisms might be important for different taxa or that separate mechanisms can  
433 operate simultaneously or in concert will provide key advances (Neiman et al. 2017). Finally, our  
434 study invites a formal comparison of outcomes of field versus laboratory studies that address the  
435 maintenance of sex. Evaluating whether lab studies consistently deliver similar vs. different  
436 outcomes than field studies with respect to particular mechanisms or taxa would be especially  
437 illuminating.

## 438 **References**

- 439 Aanen D, Beekman M, Kokko H. 2016 Introduction: Weird sex: the underappreciated diversity  
440 of sexual reproduction *Phil. Trans. R. Soc. B* **371**, 20160262.
- 441 Agh N, Abatzopoulos TJ, Kappas I, Van Stappen G, Razavi Rouhani SM, Sorgeloos P. 2007  
442 Coexistence of sexual and parthenogenetic *Artemia* populations in Lake Urmia and neighboring  
443 lagoons. *Int. Rev. Hydrobiol.* **92**, 48-60.
- 444 Agrawal AF. 2009a Differences between selection on sex versus recombination in Red Queen  
445 models with diploid hosts. *Evolution* **63**, 2131-2141.

- 446 Agrawal AF. 2009b Spatial heterogeneity and the evolution of sex in diploids. *Am. Nat.* **174**,  
447 S54-S70.
- 448 Ament-Velásquez SL, Figuet E, Ballenghien M, Zattara EE, Norenburg JL, Fernández-Álvarez,  
449 Bierne J, Bierne N, Galtier N. 2016. Population genomics of sexual and asexual lineages in  
450 fissiparous ribbon worms (Lineus, Nemertea): hybridization, polyploidy and the Meselson effect.  
451 *Mol. Ecol.* **25**, 3356-3369.
- 452 Bankers L, Fields P, McElroy KE, Boore JL, Logsdon JM Jr, Neiman M. 2017 Genomic  
453 evidence for population-specific responses to co-evolving parasites in a New Zealand freshwater  
454 snail. *Mol. Ecol.* **26**, 3663-3675.
- 455 Barraclough TG, Fontaneto D, Ricci C, Herniou EA. 2007 Evidence for inefficient selection  
456 against deleterious mutations in cytochrome oxidase I of asexual bdelloid rotifers. *Mol. Biol.*  
457 *Evol.* **24**, 1952-1962.
- 458 Barton NH. 1995 A general model for the evolution of recombination. *Genet. Res.* **65**, 123-144.
- 459 Barton NH. 2009 Why sex and recombination? *Cold Spring Harb. Symp. Quant. Biol.* **74**, 187-95.
- 460 Bast J, Schaefer I, Schwander T, Maraun M, Scheu S, Kraaijeveld K. 2016 No accumulation of  
461 transposable elements in asexual arthropods. *Mol. Biol. Evol.* **33**, 697-706.
- 462 Becks L, Agrawal AF. 2012 The evolution of sex is favoured during adaptation to new  
463 environments. *PLoS Biol.* **10**, e1001317.
- 464 Bell G. 1982 *The masterpiece of nature*. London, UK: Croon Helm.
- 465 Ben-Ami F, Heller J. 2008 Sex versus parasitism versus density. *Biol. J. Linn. Soc.* **93**, 537-544.
- 466 Ben-Ami F, Heller J. 2005 Spatial and temporal patterns of parthenogenesis and parasitism in the  
467 freshwater snail *Melanoides tuberculata*. *J. Evol. Biol.* **18**, 138-146.
- 468 Ben-Ami F, Heller J. 2007 Temporal patterns of geographic parthenogenesis in a freshwater  
469 snail. *Biol. J. Linn. Soc.* **91**, 711-718.
- 470 Brandt A, Schaefer I, Glanz J, Schwander T, Maraun M, Scheu S, Bast J. 2017. Effective  
471 purifying selection in ancient asexual oribatid mites. *Nat. Comm* **8**, 873.
- 472 Brown SG, Kwan S, Shero S. 1995 The parasitic theory of sexual reproduction: parasitism in  
473 unisexual and bisexual geckos. *Proc. Roy. Soc. Lond. B* **260**, 317-320.
- 474 Bruvo R, Adolfsson S, Symonova R, Lamatsch DK, Schön I, Jokela J, Butlin RK, Müller S.  
475 2010 Few parasites, and no evidence for *Wolbachia* infections, in a freshwater ostracod  
476 inhabiting temporary ponds. *Biol. J. Linn. Soc.* **102**, 208-216.

- 477 Burt A. 2000 Perspective: sex, recombination, and the efficacy of selection – was Weismann  
478 right? *Evolution* **54**, 337-351.
- 479 Burt A, Bell G. 1987 Mammalian chiasma frequencies as a test of two theories of recombination.  
480 *Nature* **326**, 803-805.
- 481 Case TJ. 1990 Patterns of coexistence in sexual and asexual species of *Cnemidophorus* lizards.  
482 *Oecologia* **83**, 220-227.
- 483 Case TJ, Taper ML. 1986 On the coexistence and coevolution of asexual and sexual competitors.  
484 *Evolution* **40**, 366-387.
- 485 Crummett LT, Sears BF, Lafon DC, Wayne ML. 2013 Parthenogenetic populations of the  
486 freshwater snail *Campeloma limum* occupy habitats with fewer environmental stressors than  
487 their sexual counterparts. *Freshw. Biol.* **58**, 655-663.
- 488 Cuellar O. 1979 On the ecology of coexistence in parthenogenetic and bisexual lizards of the  
489 genus *Cnemidophorus*. *Am. Zool.*, **19**, 773-786.
- 490 Dagan Y, Liljeroos K, Jokela J, Ben-Ami F. 2013 Clonal diversity driven by parasitism in a  
491 freshwater snail. *J. Evol. Biol.* **26**, 2509-2519.
- 492 Dybdahl MF, Lively CM. 1995 Host-parasite interactions: infection of common clones in natural  
493 populations of a freshwater snail (*Potamopyrgus antipodarum*). *Proc. Roy. Soc. Lond. B Biol.*  
494 *Sci.* **260**, 99-103.
- 495 Dybdahl MF, Lively CM. 1998 Host-parasite coevolution: evidence for rare advantage and time-  
496 lagged selection in a natural population. *Evolution* **52**, 1057-1066.
- 497 Ellstrand NC, Antonovics J. 1985 Experimental studies of the evolutionary significance of sexual  
498 reproduction II. A test of the density-dependent selection hypothesis. *Evolution* **39**, 657-666.
- 499 Elzinga JA, Chevasco V, Mappes J, Grapputo A. 2012 Low parasitism rates in parthenogenetic  
500 bagworm moths do not support the parasite hypothesis for sex. *J. Evol. Biol.* **25**, 2547-2558.
- 501 Felsenstein J. 1974 The evolutionary advantage of recombination. *Genetics* **78**, 737-756.
- 502 Fox JA, Dybdahl MF, Jokela J, Lively CM. 1996 Genetic structure of coexisting sexual and  
503 clonal subpopulations in a freshwater snail (*Potamopyrgus antipodarum*). *Evolution* **50**, 1541-  
504 1548.
- 505 Ganz HH, Ebert D. 2010 Benefits of host genetic diversity for resistance to infection depend on  
506 parasite diversity. *Ecology* **91**, 1263–1268.
- 507 Gibson AK, Xu JY, Lively CM. 2016 Within-population covariation between sexual  
508 reproduction and susceptibility to local parasites. *Evolution* **70**, 2049-2060.

- 509 Goddard MR, Godfray H, Burt A. 2005. Sex increases the efficacy of natural selection in  
510 experimental yeast populations. *Nature* **434**, 636-40.
- 511 Gouyon, P-H. 1999 Sex: a pluralistic approach includes species selection. (One step beyond and  
512 it's good.). *J. Evol. Biol.* **12**, 1029-1030.
- 513 Grishkan I, Korol AB, Nevo E, Wasser SP. 2003 Ecological stress and sex evolution in soil  
514 microfungi. *Proc. Roy. Soc. Lond. B Biol. Sci.* **270**, 13-18.
- 515 Haafke J, Chakra MA, Becks L. 2016 Eco-evolutionary feedback promotes Red Queen dynamics  
516 and selects for sex in predator populations. *Evolution* **70**, 641-652.
- 517 Hamilton WD. 1980 Sex vs. non-sex vs. parasite. *Oikos* **35**, 282-290.
- 518 Hamilton WD, Axelrod R, Tanese R. 1990 Sexual reproduction as an adaptation to resist  
519 parasites (A review). *Proc. Nat. Acad. Sci. USA* **87**, 3566-3573.
- 520 Hanley KA, Bolger DT, Case TJ. 1994 Comparative ecology of sexual and asexual gecko  
521 species (*Lepidodactylus*) in French Polynesia. *Evol. Ecol.* **8**, 438-454.
- 522 Hanley KA, Fisher RN, Case TJ. 1995 Lower mite infestations in an asexual gecko compared  
523 with its sexual ancestors. *Evolution* **49**, 418-426.
- 524 Henry L, Schwander T, Crespi BJ. 2012 Deleterious mutation accumulation in asexual *Timema*  
525 stick insects. *Mol. Biol. Evol.* **29**, 401-408.
- 526 Hill WG, Robertson A. 1966 The effect of linkage on limits to artificial selection. *Genet. Res.* **8**,  
527 269-294.
- 528 Hollister JD, Greiner S, Wang W, Wang J, Zhang Y, Wong GK, Wright SI, Johnson MT. 2015.  
529 Recurrent loss of sex is associated with accumulation of deleterious mutations in *Oenothera*.  
530 *Mol. Biol. Evol.* **32**, 896-905.
- 531 Howard RS, Lively CM. 1994 Parasitism, mutation accumulation, and the maintenance of sex.  
532 *Nature* **367**, 554-557.
- 533 Innes DJ, Ginn M. 2014 A population of sexual *Daphnia pulex* resists invasion by asexual  
534 clones. *Proc. Roy. Soc. Lond. B* **281**, 20140564.
- 535 Jaenike J. 1978 An hypothesis to account for the maintenance of sex within populations. *Evol.*  
536 *Theor.* **3**, 191-194.
- 537 Jiang X, Tang H, Ye Z, Lynch M. 2017 Insertion polymorphisms of mobile genetic elements in  
538 sexual and asexual populations of *Daphnia pulex*. *Genome Biol. Evol.* **9**, 362-374.

- 539 Johnson SG. 1994 Parasitism, reproductive assurance and the evolution of reproductive mode in  
540 a fresh-water snail. *Proc. Roy. Soc. Lond. B Biol. Sci.* **255**, 209-213.
- 541 Johnson SG, Howard RS. 2007 Contrasting patterns of synonymous and nonsynonymous  
542 sequence evolution in asexual and sexual freshwater snail lineages. *Evolution* **61**, 2728-2735.
- 543 Johnson MTJ, Smith SD, Rausher MD. 2009 Plant sex and the evolution of plant defenses  
544 against herbivores. *Proc. Nat. Acad. Sci. USA* **106**, 18079-18084.
- 545 Jokela J, Lively CM. 1995 Parasites, sex, and early reproduction in a mixed population of  
546 freshwater snails. *Evolution* **49**, 1268-1271.
- 547 Jokela J, Dybdahl MF, Lively CM. 2009 The maintenance of sex, clonal dynamics, and host-  
548 parasite coevolution in a mixed population of sexual and asexual snails. *Am. Nat.* **174**, S43-S53.
- 549 Kaltz O, Bell G. 2002. The ecology and genetics of fitness in *Chlamydomonas*. XII. Repeated  
550 sexual episodes increase rates of adaptation to novel environments. *Evolution* **56**, 1743-1753.
- 551 Kearney MR, Moussalli A, Strasburg J, Lindenmayer D, Moritz C. 2003 Geographic  
552 parthenogenesis in the Australia arid zone: I. A climatic analysis of the *Heteronotia binoei*  
553 complex (Gekkonidae). *Evol. Ecol. Res.* **5**, 953-976.
- 554 Killick SC, Obbard DJ, West SA, Little TJ. 2008 Parasitism and breeding system variation in  
555 North American populations of *Daphnia pulex*. *Ecol. Res.* **23**, 235-240.
- 556 King KC, Lively CM. 2009 Geographic variation in sterilizing parasite species and the Red  
557 Queen. *Oikos* **118**, 1416-1420.
- 558 King KC, Jokela J, Lively CM. 2011 Parasites, sex, and clonal diversity in natural snail  
559 populations. *Evolution* **65**, 1474-1481.
- 560 Kondrashov AS. 1993 Classification of hypotheses on the advantage of amphimixis. *J. Hered.*  
561 **84**, 372-387.
- 562 Klkylođlu O, Sari N, Akdemir D, Yavuzatmaca M, Altinbađ C. 2012 Distribution of sexual  
563 and asexual ostracoda (Crustacea) from different altitudinal ranges in the Ordu region of Turkey:  
564 Testing the Rapoport Rule. *High Alt. Med. Biol.* **13**, 126-137.
- 565 Lavanchy G, Strehler M, Roman MNL, Lessard-Therrien M, Humbert JY, Dumas Z, Jalvingh K,  
566 Ghali K, Fontcuberta Garca-Cuenca A, Zijlstra B, Arlettaz R, Schwander T. 2016 Habitat  
567 heterogeneity favours asexual reproduction in natural populations of grasshrips. *Evolution* **70**,  
568 1780-1790.
- 569 Lehto MP, Haag CR. 2010 Ecological differentiation between coexisting sexual and asexual  
570 strains of *Daphnia pulex*. *J. Anim. Ecol.* **79**, 1241-1250.



- 571 Lehtonen J, Jennions MD, Kokko H. 2012 The many costs of sex. *Trends Ecol. Evol.* **27**, 172-  
572 178.
- 573 Lively CM. 1987 Evidence from a New Zealand snail for the maintenance of sex by parasitism.  
574 *Nature* **328**, 519-521.
- 575 Lively CM. 1992 Parthenogenesis in a freshwater snail: reproductive assurance versus parasitic  
576 release. *Evolution* **46**, 907-913.
- 577 Lively CM, Morran LT. 2014 The ecology of sexual reproduction. *J. Evol. Biol.* **27**, 1292-1303.
- 578 Lo EY, Stefanović S, Dickinson TA. 2009. Population genetic structure of diploid sexual and  
579 polyploid apomictic hawthorns (*Crataegus*; Rosaceae) in the Pacific Northwest. *Mol. Ecol.* **18**,  
580 1145–1160.
- 581 Lovell JT, Williamson RJ, Wright SI, McKay JK, Sharbel TF. 2017 Mutation accumulation in an  
582 asexual relative of *Arabidopsis*. *PLoS Genet.* **13**, e1006550.
- 583 Lumley AJ, Michalczyk Ł, Kitson JJN, Spurgin LG, Morrison CA, Godwin JL, Dickinson ME,  
584 Martin OY, Emerson BC, Chapman T, Gage MJJ. 2015 Sexual selection protects against  
585 extinction. *Nature* **522**, 470-473.
- 586 Mark Welch DB, Meselson MS. 2001 Rates of nucleotide substitution in sexual and anciently  
587 asexual rotifers. *Proc. Nat. Acad. Sci. USA* **98**, 6720-6724.
- 588 Mau M, Lovell JT, Corral JM, Kiefer C, Koch M, Aliyu OM, Sharbel TF. 2015 Hybrid apomicts  
589 trapped in the ecological niches of their sexual ancestors. *Proc. Nat. Acad. Sci. USA* **112**, E2357-  
590 E2365.
- 591 Maynard Smith J. 1971 What use is sex? *J. Theor. Biol.* **30**, 319-335.
- 592 Maynard Smith J. 1978 *The evolution of sex*. London, UK: Cambridge University Press.
- 593 McDonald MJ, Rice DP, Desai MM. 2016 Sex speeds adaptation by altering the dynamics of  
594 molecular evolution. *Nature* **531**, 233-236.
- 595 McKone MJ, Gibson AK, Cook D, Freymiller LA, Mishkind D, Quinlan A, York JM, Lively  
596 CM, Neiman M. 2016 Fine-scale association between parasites and sex in *Potamopyrgus*  
597 *antipodarum* within a New Zealand lake. *NZ J. Zool.* **40**, 330-333.
- 598 Menken S, Smits E, Den Nijs JCM. 1995 Genetical population structure in plants: gene flow  
599 between diploid sexual and triploid asexual dandelions (*Taraxacum* section *Ruderalia*).  
600 *Evolution* **49**, 1108–1118.



- 601 Meirmans PG. 2005 Ecological and genetic interactions between diploid sexual and triploid  
602 apomictic dandelions. Ph.D. Thesis. Instituut voor Biodiversiteit en Ecosysteem Dynamica,  
603 Universiteit van Amsterdam.
- 604 Meirmans PG, Calame FG, Bretagnolle F, Felber F, den Nijs JCM. 1999 Anthropogenic  
605 disturbance and habitat differentiation between sexual diploid and apomictic triploid *Taraxacum*  
606 sect. *Ruderalia*. *Folia Geobot.* **34**, 451-469.
- 607 Meirmans S, Strand R. 2010. Why are there so many theories for sex, and what do we do with  
608 them? *J. Hered.* **101**, S3-S12.
- 609 Meirmans S, Meirmans PG, Kirkendall LR. 2012 The costs of sex: Facing real-world  
610 complexities. *Q. Rev. Biol.* **87**, 19-40.
- 611 Moritz C, McCallum H, Donnellan S, Roberts JD. 1991 Parasite loads in parthenogenetic and  
612 sexual lizards (*Heteronotia binoei*): support for the Red Queen hypothesis. *Proc. Roy. Soc. Lond.*  
613 *B Biol. Sci.* **244**, 145-149.
- 614 Muller HJ. 1964 The relation of recombination of mutational advance. *Mutat. Res.* **106**, 2-9.
- 615 Neiman M, Koskella B. 2009. Sex and the Red Queen. In *Lost Sex* (eds Schön I, Martens K, van  
616 Dijk P), pp. 133-159. Amsterdam: Springer.
- 617 Neiman M, Schwander T. 2011 Using parthenogenetic lineages to identify advantages of sex.  
618 *Evol. Biol.* **38**, 115-123.
- 619 Neiman M, Jokela J, Lively CM. 2005 Variation in asexual lineage age in *Potamopyrgus*  
620 *antipodarum*, a New Zealand snail. *Evolution* **59**, 1945-1952.
- 621 Neiman M, Lively CM, Meirmans S. 2017 Why sex? A pluralist approach revisited. *Trends*  
622 *Ecol. Evol.* **32**, 589-600.
- 623 Neiman M, Hehman G, Miller JT, Logsdon JM Jr, Taylor DR. 2010 Accelerated mutation  
624 accumulation in asexual lineages of a freshwater snail. *Mol. Biol. Evol.* **27**, 954-963.
- 625 Normark BB, Moran NA. 2000. Testing for the accumulation of deleterious mutations in asexual  
626 eukaryote genomes using molecular sequences. *J. Nat. Hist.* **34**, 1719-1729.
- 627 O'Connell LM, Eckert CG. 2001 Differentiation in reproductive strategy between sexual and  
628 asexual populations of *Antennaria parlinii* (Asteraceae). *Evol. Ecol. Res.* **3**, 311-330.
- 629 Paczesniak D, Adolfsson S, Liljeroos K, Klappert K, Lively CM, Jokela J. 2014 Faster clonal  
630 turnover in high-infection habitats provides evidence for parasite-mediated selection. *J. Evol.*  
631 *Biol.* **27**, 417-428.

- 632 Paland S, Lynch M. 2006 Transitions to asexuality result in excess amino acid substitutions.  
633 *Science* **311**, 990-992.
- 634 Pellino M, Hojsgaard D, Schmutzer T, Scholz U, Hörandl E, Vogel H, Sharbel TF. 2013 Asexual  
635 genome evolution in the apomictic *Ranunculus auricomus* complex: examining the effects of  
636 hybridization and mutation accumulation. *Mol. Ecol.* **22**, 5908-5921.
- 637 Peters AD, Lively CM. 1999 The red queen and fluctuating epistasis: a population genetic  
638 analysis of antagonistic coevolution. *Am. Nat.* **154**, 393-405.
- 639 Pound GE, Doncaster CP, Cox SJ. 2002 A Lotka–Volterra model of coexistence between a  
640 sexual population and multiple asexual clones. *J. Theor. Biol.* **217**, 535–545.
- 641 Rho M, Schaack S, Gao X, Kim S, Lynch M, Tang H. 2010 LTR retroelements in the genome of  
642 *Daphnia pulex*. *BMC Genomics* **11**, 425.
- 643 Ross L, Hardy NB, Okusu A, Normark BB. 2013 Large population size predicts the distribution  
644 of asexuality in scale insects. *Evolution* **67**, 196-206.
- 645 Schmit O, Adolfsson S, Vandekerkhove J, Rueda J, Bode SNS, Rossetti G, Michalakis Y, Jokela  
646 J, Martens K, Mesquita-Joanes F. 2013a The distribution of sexual reproduction of the  
647 geographic parthenogen *Eucypris virens* (Crustacea: Ostracoda) matches environmental  
648 gradients in a temporary lake. *Can. J. Zool.* **91**, 660-671.
- 649 Schmit O, Bode SNS, Camacho A, Horne DJ, Lamatsch DK, Martens K, Martins MJF,  
650 Namiotko T, Rossetti G, Rueda-Sevilla J, Schön I, Vandekerkhove J, Mesquita-Joanes F. 2013b  
651 Linking present environment and the segregation of reproductive modes (geographical  
652 parthenogenesis) in *Eucypris virens* (Crustacea: Ostracoda). *J. Biogeog.* **40**, 2394-2408.
- 653 Sharp N, Otto SP. 2016 Evolution of sex: Using experimental genomics to select among  
654 competing theories. *Bioessays* **38**, 751-757.
- 655 Singh ND, Criscoe DR, Skolfield S, Kohl KP, Keebaugh ES, Schlenke TA. 2015 Fruit flies  
656 diversify their offspring in response to parasite infection. *Science* **349**, 747-750.
- 657 Song Y, Drossel B, Scheu S. 2011 Tangled Bank dismissed too early. *Oikos* **120**, 1601-1607.
- 658 Stefani, R. 1956. *Il problema della partenogenesi in "Haploembia solieri" Ramb.* (Embioptera-  
659 Oligotomidae). *Memorie dell'Accademia Lincei Rome Sez IIIa* **5**, 127-201.
- 660 Stefani, R. 1959. *Aspetti zoogeografici di un problema evolutivo.* *Bollettino di Zoologia Torino*  
661 **26**, 105-114.
- 662 Steiner BL, Armbruster GFJ, Scheepens JF, Stöcklin J. 2012 Distribution of bulbil- and seed-  
663 producing plants of *Poa alpine* (Poaceae) and their growth and reproduction in common gardens  
664 suggest adaptation to different elevations. *Am. J. Bot.* **99**, 2035-2044.

- 665 Sterken MG, Snoek LB, Kammenga JE, Andersen EC. 2015 The laboratory domestication of  
666 *Caenorhabditis elegans*. *Trends Genet.* **31**, 224-231.
- 667 Tarkhnishvili D, Gavashelishvili A, Avaliani A, Murtskhvaladze M, Mumladze L. 2010  
668 Unisexual rock lizard might be outcompeting its bisexual progenitors in the Caucasus. *Biol. J.*  
669 *Linn. Soc.* **101**, 447-460.
- 670 Tilquin A, Kokko H. 2016. What does the geography of parthenogenesis teach us about sex?  
671 *Phil. Trans. Roy. Soc. Lond. B* **371**, 20150538.
- 672 Tucker A, Ackerman M, Eads B, Xu S, Lynch M. 2013 Population-genomic insights into the  
673 evolutionary origin and fate of obligately asexual *Daphnia pulex*. *Proc. Nat. Acad. Sci. USA* **110**,  
674 15740-15745.
- 675 van der Kooij CJ, Matthey-Doret C, Schwander T. 2017 Evolution and comparative ecology of  
676 parthenogenesis. *Evol. Lett.*, *in press*, DOI: 10.1002/evl3.30.
- 677 Verduijn MH, Van Dijk PJ, Van Damme JMM. 2004 The role of tetraploids in the sexual-  
678 asexual cycle in dandelions (*Taraxacum*). *Heredity* **93**, 390-398.
- 679 Vergara D, Lively CM, King KC, Jokela J. 2013 The geographic mosaic of sex and infection in  
680 lake populations of a New Zealand snail at multiple spatial scales. *Am. Nat.* **182**, 484-493.
- 681 Vergara D, Jokela J, Lively CM. 2014 Infection dynamics in coexisting sexual and asexual host  
682 populations: support for the Red Queen hypothesis. *Am. Nat.* **184**, S22-S30.
- 683 Verhoeven KJF, Biere A. 2013 Geographic parthenogenesis and plant-enemy interactions in the  
684 common dandelion. *BMC Evol. Biol.* **13**, 23.
- 685 Vrijenhoek RC. 1979 Factors affecting clonal diversity and coexistence. *Am. Zool.* **19**, 787-797.
- 686 West SA, Lively CM, Read AF. 1999 A pluralist approach to sex and recombination. *J. Evol.*  
687 *Biol.* **12**, 1003-1012.
- 688 Williams GC. 1975 *Sex and evolution*. Princeton, USA: Princeton University Press.
- 689 Xu S, Omilian AR, Cristescu ME. 2011 High rate of large-scale hemizygous deletions in  
690 asexually propagating *Daphnia*: Implications for the evolution of sex. *Mol. Biol. Evol.* **28**, 335-  
691 342.
- 692  
693  
694  
695

696 **Table Caption**

697

698 Table 1. Summary of the results of our literature survey. We list the number of studies that  
 699 provided support (green) or no support (red) for the different categories of mechanisms for sex,  
 700 separated by taxonomic group. In total, 66 studies and 83 cases were included; studies that tested  
 701 multiple mechanisms or included multiple taxonomic groups were counted as “cases” multiple  
 702 times. Numbers in brackets after the name of the taxonomic group indicate the number of studies  
 703 for each group.

| Class/clade             | Parasites | Rate of adaptive evolution | Harmful Mutations | Niche differentiation | Niche breadth | Other |
|-------------------------|-----------|----------------------------|-------------------|-----------------------|---------------|-------|
| Reptiles (8)            | 2 / 1     | -                          | -                 | 2 / 2                 | 0 / 2         | -     |
| Insects (6)             | 0 / 2     | -                          | 2 / 1             | -                     | 0 / 2         | -     |
| Branchiopods (8)        | 0 / 1     | -                          | 4 / 0             | 2 / 0                 | 0 / 1         | 1 / 0 |
| Ostracods (4)           | 0 / 1     | 2 / 0                      | -                 | 2 / 1                 | 0 / 2         | -     |
| Arachnids (1)           | -         | -                          | 0 / 1             | -                     | -             | -     |
| Arthropods; general (1) | -         | -                          | 0 / 1             | -                     | -             | -     |
| Gastropods (23)         | 17 / 4    | 0 / 1                      | 4 / 0             | 1 / 0                 | 1 / 0         | 3 / 1 |
| Rotifers (2)            | -         | -                          | 1 / 1             | -                     | -             | -     |
| Anopla (1)              | -         | -                          | 1 / 0             | -                     | -             | -     |
| Magnoliopsida (11)      | 2 / 0     | -                          | 2 / 1             | 5 / 1                 | -             | 1 / 0 |
| Fungi (1)               | -         | -                          | -                 | 1 / 0                 | -             | -     |
| TOTAL                   | 21 / 9    | 2 / 1                      | 14 / 5            | 13 / 4                | 1 / 7         | 5 / 1 |

704
